# Supplementary material
Source: PubMed Central journal article supplement (PMC3911181)
Supplement: JB.01201-13_zjb999093036so1.pdf [file JB.01201-13_zjb999093036so1.pdf]

**table S1: strains and plasmids**

| Strain or plasmid | Description                                                                                                       | Reference  |
|-------------------|-------------------------------------------------------------------------------------------------------------------|------------|
| Strains           |                                                                                                                   |            |
| <i>E. coli</i>    |                                                                                                                   |            |
| TOP10             | Competent <i>E. coli</i> for plasmid transformation                                                               | Invitrogen |
| BL21              | BL21(DE3)pLysS strain for protein expression                                                                      | Promega    |
| BL21-121          | BL21 with <i>relP</i> gene under P <sub>IPTG</sub> control, amp                                                   | This work  |
| BL21-122          | BL21 with <i>relQ</i> gene under P <sub>IPTG</sub> control, amp                                                   | This work  |
| <i>S. aureus</i>  |                                                                                                                   |            |
| RN4220            | Restriction deficient <i>S. aureus</i> strain, r <sup>-</sup>                                                     | (1)        |
| RN4220-55         | RN4220 with <i>rsh</i> gene under P <sub>spac</sub> control in the chromosome, <i>ermC</i>                        | (2)        |
| HG001             | <i>rsbU</i> restored RN1 (8325), previously named RN1HG                                                           | (3, 4)     |
| HG001-55          | HG001 with <i>rsh</i> gene under P <sub>spac</sub> control in the chromosome, <i>ermC</i>                         | (2)        |
| HG001-86          | HG001 <i>rsh</i> <sub>Syn</sub> (Δ942-950nt)                                                                      | (2)        |
| HG001-229         | HG001 <i>relP</i> (Δ450-536nt)                                                                                    | This work  |
| HG001-230         | HG001 <i>relQ</i> (Δ343-429nt)                                                                                    | This work  |
| HG001-229-230     | HG001 <i>relP/relQ</i> double mutant                                                                              | This work  |
| HG001-229-230-263 | HG001 <i>rsh/relP/relQ</i> triple mutant referred as (p)ppGpp <sup>0</sup>                                        | This work  |
| USA300JE2 NE554   | <i>vraR</i> ::Tn bursa aurealis mutant                                                                            | (5)        |
| HG001 NE554       | <i>vraR</i> ::Tn bursa aurealis mutant                                                                            | This work  |
| Plasmids          |                                                                                                                   |            |
| pET15b            | Protein expression vector, P <sub>IPTG</sub> , amp                                                                | Novagen    |
| pMUTIN4           | Integrative vector including the IPTG-inducible promoter P <sub>spac</sub> , (Ap <sup>r</sup> , Em <sup>r</sup> ) | (6)        |
| pKOR1             | AHT inducible suicide mutagenesis vector                                                                          | (7)        |
| pCG86             | pKOR1 with mutated <i>rsh</i> synthase domain (Δ942-950nt)                                                        | (2)        |
| pCG263            | pKOR1 with mutated <i>rsh</i> (Δ249-951nt)                                                                        | This work  |
| pCG229            | pKOR1 with mutated <i>relP</i> synthase (Δ450-536nt)                                                              | This work  |
| pCG230            | pKOR1 with mutated <i>relQ</i> synthase (Δ343-429nt)                                                              | This work  |
| pCG121            | <i>relP</i> gene in protein expression vector pET15b                                                              | This work  |
| pCG122            | <i>relQ</i> gene in protein expression vector pET15b                                                              | This work  |
| pCG248            | anhydrotetracycline (ATc) inducible vector                                                                        | (8, 9)     |
| pCG258            | ATc inducible vector with <i>relP</i>                                                                             | (8, 9)     |
| pCG259            | ATc inducible vector with <i>relQ</i>                                                                             | (8, 9)     |
| pCG328            | ATc inducible vector with <i>rsh</i> <sub>Hyd</sub>                                                               | (8, 9)     |

## References:

1. **Kreiswirth BN, Lofdahl S, Betley MJ, O'Reilly M, Schlievert PM, Bergdoll MS, Novick RP.** 1983. The toxic shock syndrome exotoxin structural gene is not detectably transmitted by a prophage. *Nature* **305**:709-712.
2. **Geiger T, Goerke C, Fritz M, Schafer T, Ohlsen K, Liebeke M, Lalk M, Wolz C.** 2010. Role of the (p)ppGpp synthase RSH, a RelA/SpoT homolog, in stringent response and virulence of *Staphylococcus aureus*. *Infect. Immun.* **78**:1873-1883.
3. **Pohl K, Francois P, Stenz L, Schlink F, Geiger T, Herbert S, Goerke C, Schrenzel J, Wolz C.** 2009. CodY in *Staphylococcus aureus*: a regulatory link between metabolism and virulence gene expression. *J. Bacteriol.* **191**:2953-2963.
4. **Herbert S, Ziebandt AK, Ohlsen K, Schafer T, Hecker M, Albrecht D, Novick R, Gotz F.** 2010. Repair of global regulators in *Staphylococcus aureus* 8325 and comparative analysis with other clinical isolates. *Infect. Immun.* **78**:2877-2889.
5. **Fey PD, Endres JL, Yajjala VK, Widhelm TJ, Boissy RJ, Bose JL, Bayles KW.** 2013. A genetic resource for rapid and comprehensive phenotype screening of nonessential *Staphylococcus aureus* genes. *MBio* **4**:e00537-00512.
6. **Vagner V, Dervyn E, Ehrlich SD.** 1998. A vector for systematic gene inactivation in *Bacillus subtilis*. *Microbiology* **144 ( Pt 11)**:3097-3104.
7. **Bae T, Schneewind O.** 2006. Allelic replacement in *Staphylococcus aureus* with inducible counter-selection. *Plasmid* **55**:58-63.
8. **Schroder W, Goerke C, Wolz C.** 2013. Opposing effects of aminocoumarins and fluoroquinolones on the SOS response and adaptability in *Staphylococcus aureus*. *The Journal of antimicrobial chemotherapy* **68**:529-538.
9. **Helle L, Kull M, Mayer S, Marincola G, Zelder ME, Goerke C, Wolz C, Bertram R.** 2011. Vectors for improved Tet repressor-dependent gradual gene induction or silencing in *Staphylococcus aureus*. *Microbiology* **157**:3314-3323.

**table S2: oligonucleotides**

| <b>Purpose and Description</b>                                                                       | <b>Template</b>                                    | <b>Name</b>    | <b>Sequence</b>                                                                                                                 |
|------------------------------------------------------------------------------------------------------|----------------------------------------------------|----------------|---------------------------------------------------------------------------------------------------------------------------------|
| <b>Mutagenesis</b><br><br><i>relP</i> mutant                                                         | H G001                                             | attB1relP2-for | GGGGACAAGTTTGTACAAAAA<br>GCAGGCTTGGTCACTATCACA<br>CGAA                                                                          |
|                                                                                                      |                                                    | relPmut-rev    | ACTTGCCACATATCCATACCT<br>ATCCTAGGACCATTTCTTTAG<br>GGTGCTGAAT                                                                    |
|                                                                                                      |                                                    | relPmut-for    | ATAGGTATGGATATGTGGGCA<br>GGGGACCACTTTGTACAAGAA<br>AGCTGGGTTGGGCGAGTATTT<br>AGCAA                                                |
|                                                                                                      |                                                    | attB2relP2-rev | GGGGACAAGTTTGTACAAAAA<br>GCAGGCTTAAAGGTTGATGAT<br>GTTCCG                                                                        |
| <i>relQ</i> mutant                                                                                   | HG001                                              | attB1relQ-for  | CGTTGCCAGAAATTCATTGCT<br>AACCTAGGACCACTTTCTTTAG<br>TGTTACGAAT                                                                   |
|                                                                                                      |                                                    | relQmut-rev    | TTAGCAATGAATTTCTGGGCA<br>GGGGACCACTTTGTACAAGAA<br>AGCTGGGTCGCGGTAAATGAA<br>TTTCTAA                                              |
|                                                                                                      |                                                    | relQmut-for    | GGGGACAAGTTTGTACAAAAA<br>GCAGGCTATTAGGCGGTATCG<br>TAGT                                                                          |
|                                                                                                      |                                                    | attB2relQ-rev  | GCCTACTACTGTAGTATGCAAC<br>AAAAACCTGCGACAAT<br>TTGCATACTACAGTAGTAGGC<br>GGGGACCACTTTGTACAAGAA<br>AGCTGGGTGCTGCGAATAAAT<br>CATCTT |
| <b>Construction of hybridization probes</b><br><br><i>vraR</i><br><br><i>relP</i><br><br><i>relQ</i> | HG001<br>HG001<br>HG001<br>HG001<br>HG001<br>HG001 | vraRDIG-for    | GGAATTTCAAGTTATCTATCAA                                                                                                          |
|                                                                                                      |                                                    | vraRDIG-rev    | TGAGTAACCTTTTCGCAATCA                                                                                                           |
|                                                                                                      |                                                    | relPDIG-for    | GTCGCACATTCTTTCAGT                                                                                                              |
|                                                                                                      |                                                    | relPDIG-rev    | CGTTATTAGGTTTCGTAGAGTT                                                                                                          |
|                                                                                                      |                                                    | relQDIG-for    | AAGCGGTTGATGAGTTGA                                                                                                              |
|                                                                                                      |                                                    | relQDIG-rev    | AAATACGCTGCTTCTGCC                                                                                                              |

|                               |                                  |                                                                             |                                                                                                                                                         |
|-------------------------------|----------------------------------|-----------------------------------------------------------------------------|---------------------------------------------------------------------------------------------------------------------------------------------------------|
| <i>rsh</i>                    | HG001<br>HG001                   | rshDIG-for<br>rshDIG-rev                                                    | CGGCTCTTCGTTATATTGATAA<br>GGCAACTCAATAACATCAC                                                                                                           |
| <b>Protein purification</b>   |                                  |                                                                             |                                                                                                                                                         |
| RelP                          | HG001<br>HG001                   | XhoI pETrelP-<br>for<br>BamHI pETrel<br>P-rev                               | CCCCCTCGAGATGTATGTAGAT<br>CGAAAACCAT<br>GGGGGGATCCCTACTCTGTTA<br>TTTCAGAAATGAA                                                                          |
| RelQ                          | HG001<br>HG001                   | XhoI pETrelQ-<br>for<br>BamHI pETrel<br>Q-rev                               | GGGGCTCGAGATGAATCAATG<br>GGATCAGTT<br>GGGGGGATCCCTTAATCATTTTC<br>ATGTTTTTT                                                                              |
| <b>ATc inducible plasmids</b> |                                  |                                                                             |                                                                                                                                                         |
| pRelP                         | HG001<br>HG001                   | SallrelPfor<br>SallrelPprev                                                 | CCGGGTCGACAAAATGTTAGGTA<br>CAATAAAGA<br>CCGGGTCGACGAACACACCTACT<br>AACAT                                                                                |
| pRelQ                         | HG001<br>HG001                   | SallrelQfor<br>SallrelQrev                                                  | AATTGTCGACTGCAACCGTTGAA<br>GAAACAT<br>TTAAGTCGACCGCATGATTTATAA<br>CACCTCG                                                                               |
| pRSH <sub>Hyd</sub>           | HG001<br>HG001<br>HG001<br>HG001 | EcoRIrel115<br>1<br>HDreplaceA<br>Srev<br>HDreplaceA<br>Sfor<br>EcoRIrelrev | AAAAGAATTCGTACCTAAATCATT<br>GTTTAAGGCG<br>ATACGGTGTATCTTCAATTACGGA<br>GGCCAAAAAACCTGC<br>GTAATTGAAGATACACCGTAT<br>CCCCGAATTCCTCGATACCGACTA<br>ATAACAATA |

Underlined: artificial restriction sites

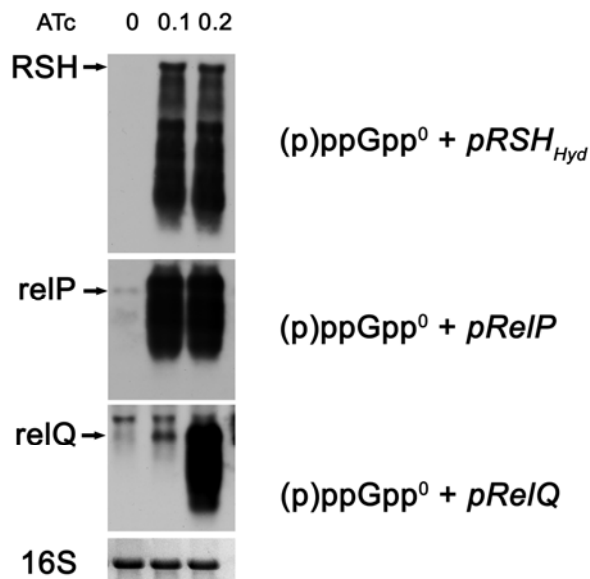

**Figure S1:** Overexpression of the three (p)ppGpp Synthases.

(p)ppGpp<sup>0</sup> mutants complemented with *pRSH<sub>Hyd</sub>*, *pRelP*, or *pRelQ* synthases were grown in CYPG to the exponential growth phase followed by further incubation with and without ATc ( $\mu\text{g/ml}$ ) for one hour. RNA was hybridized with digoxigenin-labeled PCR fragments. The 16S rRNA detected in the ethidium bromide-stained gels is indicated as loading control in the lower lane.
